# Supplementary material
Source: MDPI journal article supplement (https://www.mdpi.com/2079-6412/13/2/315)
Supplement: s1 [file s1 › coatings-2153680-supplementary.pdf]

## Article

# Coating Readily Available Yet Thermally Resistant Surfaces with 3D Silver Nanowire Scaffolds: A Step toward Efficient Heater Fabrication

Anas A. M. Alqanoo <sup>1,2</sup>, Naser M. Ahmed <sup>1,\*</sup>, Md Roslan Hashim <sup>1</sup>, Ahmed Alsadig <sup>3</sup>, Shahad Al-Yousif <sup>4</sup>, Sofyan A. Taya <sup>2</sup>, Osamah A. Aldaghri <sup>5</sup> and Khalid Hassan Ibnaouf <sup>5,\*</sup>

<sup>1</sup> School of Physics, Universiti Sains Malaysia, Penang 11800, Malaysia

<sup>2</sup> Physics Department, Islamic University of Gaza, Gaza P.O. Box 108, Palestine

<sup>3</sup> CNR NANOTEC Institute of Nanotechnology, via Monteroni, 73100 Lecce, Italy

<sup>4</sup> College of Engineering, Department of Electrical and Electronics Engineering, Gulf University, Sanad 26489, Bahrain

<sup>5</sup> Physics Department, College of Science, Imam Mohammad Ibn Saud Islamic University (IMSIU), Riyadh 13318, Saudi Arabia

\* Correspondence: naser@usm.my (N.M.A.); khiahmed@imamu.edu.sa (K.H.I.)

## Supporting Information

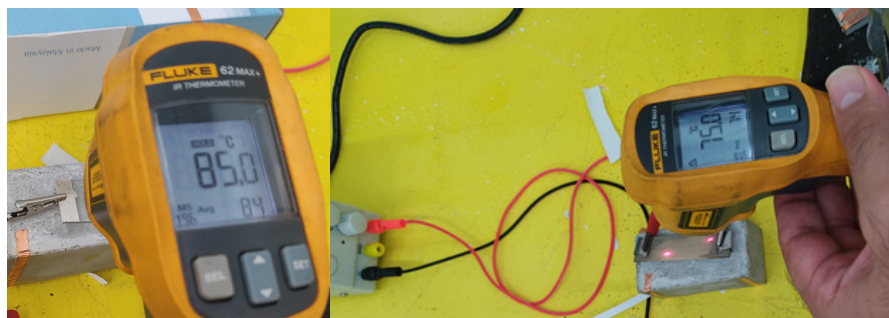

**Scheme S1.** Real images during the measurement process.

**Citation:** Alqanoo, A.A.M.; Ahmed, N.M.; Hashim, M.R.; Al-Yousif, S.; Taya, S.A.; Alsadig, A.; Aldaghri, O.A.; Ibnaouf, K.H. Coating Readily Available Yet Thermally Resistant Surfaces with 3-D Silver Nanowires Scaffolds: A Step toward Efficient Heater Fabrication. *Coatings* **2023**, *13*, x. <https://doi.org/10.3390/coatings13020315>

Academic Editor: Shijie Wang

Received: 26 December 2022

Revised: 17 January 2023

Accepted: 27 January 2023

Published: 31 January 2023

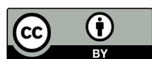

**Copyright:** © 2023 by the authors. Submitted for possible open access publication under the terms and conditions of the Creative Commons Attribution (CC BY) license (<https://creativecommons.org/licenses/by/4.0/>).
